# Supplementary material
Source: PubMed Central journal article supplement (PMC6204903)
Supplement: supp_RA118.004716_139204_1_supp_193537_pk82bs.pdf [file supp_RA118.004716_139204_1_supp_193537_pk82bs.pdf]

## **Supporting Information**

### **Palmitic acid binding to conjugative traffic ATPases as a drug-target interaction to inhibit bacterial conjugation**

**Yolanda García-Cazorla <sup>1</sup>, María Getino <sup>1,#</sup>, David J. Sanabria-Ríos <sup>2</sup>, Néstor M. Carballeira<sup>3</sup>,  
Fernando de la Cruz <sup>1</sup>, Ignacio Arechaga <sup>1,\*</sup> and Elena Cabezón <sup>1,\*</sup>**

This document includes 2 figures (Figure 1S and Figure 2S) with their respective legends

**Figure 1S**

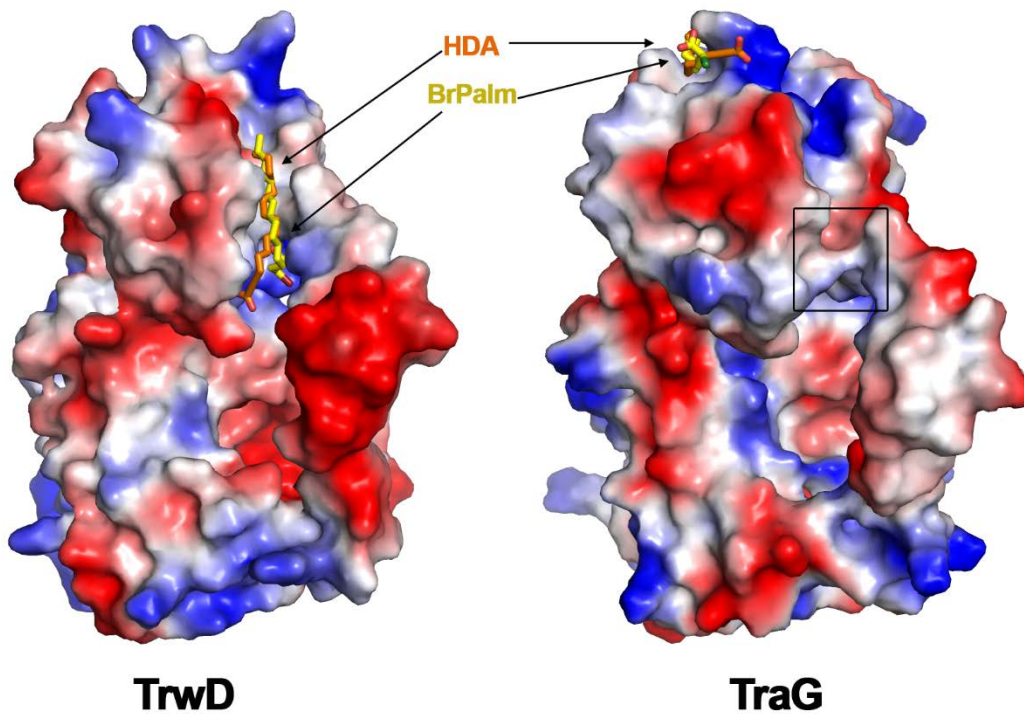

**Figure 1S. Comparison of TrwD and TraG structures.** Surface representation of VirB11 homologs from conjugative plasmids R388 and pKM101, respectively. The predicted binding site for 2-HDA (*orange*) and 2-bromopalmitic acid (*yellow*) in TrwD is located in a pocket formed by the N-terminus and the linker region of the protein. Such a pocket is occluded in TraG by two hydrophobic residues (boxed area). Moreover, the global charge balance is different, being much more electropositive in TrwD than in TraG.

Figure 2S

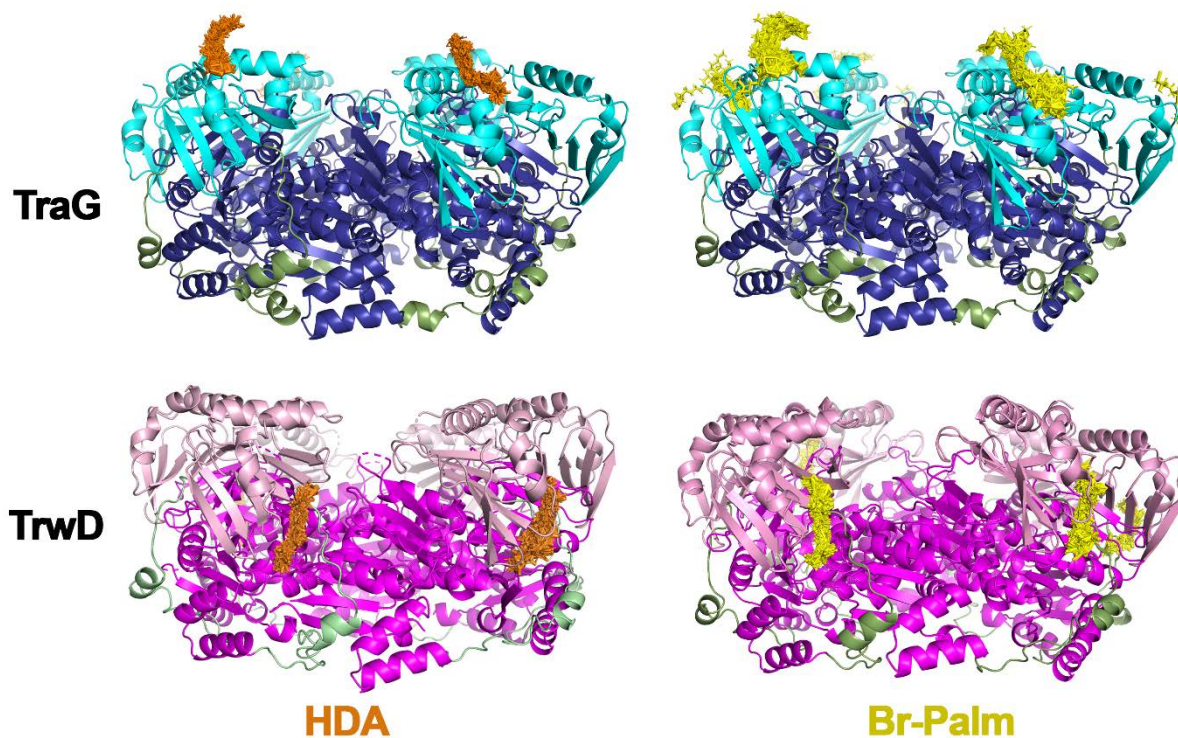

**Figure 2S. Blind docking of fatty acids into the molecular models of TrwD and TraG.** Blind docking predictions between both proteins and fatty acid ligands (2-HDA) and 2-bromopalmitic acid) were performed using the EADock dihedral spacing sampling engine of the Swiss-dock server (32). All predicted binding poses (250) are shown for both, TraG and TrwD, respectively. In TraG, all the binding poses locate at the upper side of the N-terminal domain (NTD, *cyan*), whereas in TrwD the fatty acids fit into a pocket located at the interface between the NTD (*pink*) and the linker region (*dark green*), which connects the NTD with the catalytic C-terminal domain (CTD, *magenta* in TrwD and *blue* in TraG). In the case of TrwD, binding of the fatty acids in that region will prevent the movement of the NTD over the CTD, whereas in TraG, such a movement will not be affected. This might explain the lack of inhibition of TraG by unsaturated fatty acids.
